# Supplementary material for: Technological Transformation of Environmental Governance: Evidence from a Quasi-Natural Experiment in China
Source: Research Square preprint supplement (doi:10.21203/rs.3.rs-7322815/v1), 2025-12-01
Supplement: Supplementary file 1 [file 8a174f04211bcb200961d9f4.docx]

**Technological Transformation of Environmental Governance: Evidence from a Quasi-Natural Experiment in China**

***Online Appendix***

Appendix A. Background

**1. *The Establishment of Artificial Intelligence Innovation Development Pilot Zones***

Fig. A.1. List of Artificial Intelligence Innovation Development Pilot Zone.

| **Quantity** | **Name of the AI Innovation Development Pilot Zone** | **Approval Date** | **Location** | **Province** |
| --- | --- | --- | --- | --- |
| 1 | Beijing National New Generation Artificial Intelligence Innovation Development Pilot Zone | February 20, 2019 | Beijing | Beijing Municipality |
| 2 | Shanghai National New Generation Artificial Intelligence Innovation Development Pilot Zone | May 22, 2019 | Shanghai | Shanghai Municipality |
| 3 | Tianjin National New Generation Artificial Intelligence Innovation Development Pilot Zone | October 17, 2019 | Tianjin | Tianjin Municipality |
| 4 | Shenzhen National New Generation Artificial Intelligence Innovation Development Pilot Zone | October 17, 2019 | Shenzhen | Guangdong Province |
| 5 | Hangzhou National New Generation Artificial Intelligence Innovation Development Pilot Zone | October 17, 2019 | Hangzhou | Zhejiang Province |
| 6 | Hefei National New Generation Artificial Intelligence Innovation Development Pilot Zone | October 17, 2019 | Hefei | Anhui Province |
| 7 | Deqing County National New Generation Artificial Intelligence Innovation Development Pilot Zone | November 2, 2019 | Deqing County | Zhejiang Province |
| 8 | Chongqing National New Generation Artificial Intelligence Innovation Development Pilot Zone | January 23, 2020 | Chongqing | Chongqing Municipality |
| 9 | Chengdu National New Generation Artificial Intelligence Innovation Development Pilot Zone | January 23, 2020 | Chengdu | Sichuan Province |
| 10 | Xi'an National New Generation Artificial Intelligence Innovation Development Pilot Zone | January 23, 2020 | Xi'an | Shaanxi Province |
| 11 | Jinan National New Generation Artificial Intelligence Innovation Development Pilot Zone | January 23, 2020 | Jinan | Shandong Province |
| 12 | Guangzhou National New Generation Artificial Intelligence Innovation Development Pilot Zone | September 3, 2020 | Guangzhou | Guangdong Province |
| 13 | Wuhan National New Generation Artificial Intelligence Innovation Development Pilot Zone | September 3, 2020 | Wuhan | Hubei Province |
| 14 | Suzhou National New Generation Artificial Intelligence Innovation Development Pilot Zone | March 24, 2021 | Suzhou | Jiangsu Province |
| 15 | Changsha National New Generation Artificial Intelligence Innovation Development Pilot Zone | March 24, 2021 | Changsha | Hunan Province |
| 16 | Zhengzhou National New Generation Artificial Intelligence Innovation Development Pilot Zone | November 13, 2021 | Zhengzhou | Henan Province |
| 17 | Shenyang National New Generation Artificial Intelligence Innovation Development Pilot Zone | November 13, 2021 | Shenyang | Liaoning Province |
| 18 | Harbin National New Generation Artificial Intelligence Innovation Development Pilot Zone | November 13, 2021 | Harbin | Heilongjiang Province |

The establishment of Artificial Intelligence (AI) innovation pilot zones in China represents a pivotal element of the nation’s strategy to foster technological innovation and drive the application of AI across various sectors. Since 2019, the Ministry of Science and Technology has systematically launched numerous AI innovation pilot zones nationwide. These zones are designed to facilitate the deep integration of AI technologies into industry through targeted policy support, technological demonstrations, and the promotion of industrialization. In addition to focusing on the development and commercialization of AI, these pilot zones emphasize aligning AI innovations with local economic and social development, with particular attention to advancing green innovation and environmental governance.

AI is increasingly recognized not only as a catalyst for enhancing economic productivity and technological progress but also as a critical solution to pressing environmental challenges. By optimizing resource allocation, increasing operational efficiency, and reducing energy consumption, AI technologies hold transformative potential for enhancing both corporate and governmental environmental performance. Specifically, AI enables real-time environmental monitoring, allowing governments to design precise policies and optimize resource management, thus improving the efficacy and precision of environmental governance. Moreover, AI’s applications in areas such as intelligent scheduling, big data analytics, and green innovation are rapidly emerging as key drivers in enhancing the environmental performance of local governments.

Against this backdrop, numerous local governments are actively exploring the application of AI in environmental governance, seeking ways to leverage these technologies to enhance their environmental performance. Cities at the forefront of technological innovation, such as Beijing and Shanghai, have already achieved notable advancements in areas including smart city development, intelligent manufacturing, and environmental monitoring, while accumulating valuable insights through pilot projects. The scope of AI applications extends beyond environmental monitoring and data analysis to encompass policy development, ecological restoration, and pollution control, thus providing both data-driven and intelligence-based support for governmental decision-making in the realm of environmental governance.

In sum, the establishment of China’s national “Next-Generation AI Innovation Development Pilot Zones” is not only a critical measure to advance technological innovation and high-quality economic growth but also provides a platform for local governments to experiment with and implement AI-driven strategies to improve environmental performance. This study seeks to investigate how the creation of these pilot zones influences the environmental performance of local governments, while also examining the underlying mechanisms and factors that mediate these effects.

Appendix B. All Variables Used in Main Regression

1. ***Baseline Result***

Table A.2. *All Variables Used in Baseline Result*

|  | *DV：PM2.5 (Log)* | | | |
| --- | --- | --- | --- | --- |
|  | (1) | (2) | (3) | (4) |
| Treat | -0.088*** | -0.095*** | -0.094*** | -0.080*** |
| (0.025) | (0.026) | (0.024) | (0.016) |
| Log Per GDP |  | -0.173 | -0.141 | -0.260** |
|  | (0.146) | (0.143) | (0.126) |
| Log Fiscal revenue |  | -0.028 | -0.030 | -0.019 |
|  | (0.065) | (0.063) | (0.061) |
| Log Population |  | 0.326 | 0.404 | -0.028 |
|  | (0.327) | (0.370) | (0.343) |
| Log Temperature |  |  | 0.185 | 0.094 |
|  |  | (0.138) | (0.127) |
| Log Precipitation |  |  | 0.005 | -0.024 |
|  |  | (0.067) | (0.052) |
| Log Wind |  |  | -0.051 | -0.194** |
|  |  | (0.102) | (0.085) |
| Log Waste water |  |  |  | 0.022 |
|  |  |  | (0.030) |
| Log Solid waste |  |  |  | 0.009 |
|  |  |  | (0.022) |
| Log SO2 |  |  |  | 0.068** |
|  |  |  | (0.027) |
| Log Electricity consumption |  |  |  | 0.265*** |
|  |  |  | (0.095) |
| Constant | 3.652*** | 3.064 | 1.694 | 4.335 |
| (0.003) | (2.138) | (3.457) | (2.833) |
| Year FE | Y | Y | Y | Y |
| Province FE | Y | Y | Y | Y |
| Within R² | 0.102 | 0.132 | 0.143 | 0.303 |
| Observation | 360 | 360 | 360 | 360 |

*Notes:* Standard errors in parentheses are clustered at province level, * *p* < 0.10, ** *p* < 0.05, *** *p* < 0.01.

1. **Mechanism Analysis**

Table A.3. *The mechanism of AIIDPZ alleviates local PM2.5.*

|  | *DV: Green Innovation* | | | | *DV: Environmental Regulation Intensity* | |
| --- | --- | --- | --- | --- | --- | --- |
|  | (1) | (2) | (3) | (4) | (5) | (6) |
| Treat | 1.245** | 0.427** | 0.975*** | 0.527*** | 0.002*** | 0.002*** |
| (0.465) | (0.189) | (0.243) | (0.144) | (0.001) | (0.001) |
| Log Per GDP |  | 0.921 |  | 0.257 |  | -0.005 |
|  | (1.064) |  | (0.681) |  | (0.003) |
| Log Fiscal revenue |  | 0.077 |  | -0.343 |  | 0.001 |
|  | (0.602) |  | (0.434) |  | (0.002) |
| Log Population |  | 4.032 |  | 3.543** |  | -0.002 |
|  | (2.390) |  | (1.524) |  | (0.009) |
| Log Temperature |  | 1.981*** |  | 0.806* |  | 0.008* |
|  | (0.690) |  | (0.461) |  | (0.004) |
| Log Precipitation |  | -0.118 |  | -0.006 |  | -0.001* |
|  | (0.143) |  | (0.109) |  | (0.001) |
| Log Wind |  | -5.329*** |  | -3.251*** |  | 0.006* |
|  | (1.495) |  | (0.967) |  | (0.003) |
| Log Waste water |  | -0.279 |  | -0.179 |  | 0.000 |
|  | (0.417) |  | (0.240) |  | (0.001) |
| Log Solid waste |  | -1.083*** |  | -0.559*** |  | -0.000 |
|  | (0.240) |  | (0.104) |  | (0.001) |
| Log SO2 |  | -0.966 |  | -0.425 |  | -0.002* |
|  | (0.589) |  | (0.418) |  | (0.001) |
| Log Electricity consumption |  | -0.568 |  | -0.706 |  | 0.002 |
|  | (0.713) |  | (0.431) |  | (0.003) |
| Constant | 1.389*** | -15.306 | 0.825*** | -10.396 | 0.003*** | 0.035 |
| (0.054) | (20.673) | (0.028) | (12.413) | (0.000) | (0.069) |
| Year FE | Y | Y | Y | Y | Y | Y |
| Province FE | Y | Y | Y | Y | Y | Y |
| Within R² | 0.135 | 0.634 | 0.194 | 0.559 | 0.042 | 0.122 |
| Observation | 360 | 360 | 360 | 360 | 360 | 360 |

*Notes:* Standard errors in parentheses are clustered at province level, * *p* < 0.10, ** *p* < 0.05, *** *p* < 0.01.

1. **Heterogeneity Analysis**

Table A.4. *Heterogeneity analysis.*

|  | *M: Fiscal Autonomy* | | *M: Highest Education of the Provincial Party Secretary* | |
| --- | --- | --- | --- | --- |
|  | (1) | (2) | (3) | (4) |
| M ×Treat | -0.187*** | -0.127* | 0.015** | 0.023* |
| (0.064) | (0.069) | (0.007) | (0.013) |
| Treat | 0.020 | -0.009 | -0.122** | -0.157*** |
| (0.043) | (0.041) | (0.059) | (0.045) |
| M | 0.027 | 0.210 | 0.007 | 0.003 |
| (0.185) | (0.210) | (0.008) | (0.006) |
| Log Per GDP |  | -0.272** |  | -0.266** |
|  | (0.128) |  | (0.123) |
| Log Fiscal revenue |  | -0.064 |  | -0.028 |
|  | (0.072) |  | (0.057) |
| Log Population |  | 0.093 |  | 0.014 |
|  | (0.378) |  | (0.343) |
| Log Temperature |  | 0.108 |  | 0.091 |
|  | (0.135) |  | (0.128) |
| Log Precipitation |  | -0.026 |  | -0.027 |
|  | (0.051) |  | (0.053) |
| Log Wind |  | -0.208** |  | -0.184** |
|  | (0.078) |  | (0.085) |
| Log Waste water |  | 0.014 |  | 0.023 |
|  | (0.030) |  | (0.029) |
| Log Solid waste |  | 0.000 |  | 0.008 |
|  | (0.024) |  | (0.022) |
| Log SO2 |  | 0.063** |  | 0.072** |
|  | (0.027) |  | (0.027) |
| Log Electricity consumption |  | 0.253** |  | 0.255** |
|  | (0.096) |  | (0.094) |
| Constant | 3.638*** | 3.958 | 3.630*** | 4.137 |
| (0.090) | (2.903) | (0.026) | (2.842) |
| Year FE | Y | Y | Y | Y |
| Province FE | Y | Y | Y | Y |
| Within R² | 0.127 | 0.314 | 0.108 | 0.311 |
| Observation | 360 | 360 | 360 | 360 |

*Notes:* Standard errors in parentheses are clustered at province level, * *p* < 0.10, ** *p* < 0.05, *** *p* < 0.01.

Appendix C. Robustness Checks

1. **Testing the Hypothesis**

To validate our difference-in-differences (DID) methodology, the key assumption that must hold is the parallel trends assumption. To test this assumption, we conduct an event study using a year-by-year regression model, specified as follows:

（1）

In this model, represents a series of event-window indicator variables that capture the time relative to the implementation of the AI innovation development pilot zone policy. Here, denotes the year when the AI innovation development pilot zone policy was implemented in each province, and refers to the years before and after the policy was enacted, with taking values of -5, -4, -3, -2, -1, 0, 1, 2, 3. We include indicator variables for each of the five years prior to the policy implementation in the regression model, while any years beyond five years are aggregated into a single category. The baseline group is the year preceding the establishment of the AI innovation development pilot zone. If the selected sample and variables under study conform to the parallel trends assumption, we expect that the coefficients on the pre-reform variables should not be statistically significant. The results presented in Table A5 show that the indicator variables for the four years preceding the establishment of the AI innovation pilot zone do not significantly impact the dependent variable, supporting the validity of the parallel trends assumption for our study.

Table A.5*. Dynamic Effects and Common Trend*

|  | *DV：PM2.5 (Log)* | | | |
| --- | --- | --- | --- | --- |
|  | (1) | (2) | (3) | (4) |
|  | -0.030 | -0.032 | -0.031 | -0.027 |
| (0.037) | (0.035) | (0.034) | (0.033) |
|  | -0.012 | -0.013 | -0.014 | -0.014 |
| (0.017) | (0.016) | (0.016) | (0.016) |
|  | 0.000 | 0.000 | -0.002 | 0.004 |
| (0.016) | (0.015) | (0.015) | (0.015) |
|  | -0.007 | -0.007 | -0.010 | -0.004 |
| (0.021) | (0.020) | (0.019) | (0.017) |
|  | -0.069** | -0.074** | -0.074*** | -0.064*** |
| (0.028) | (0.028) | (0.025) | (0.019) |
|  | -0.100*** | -0.108*** | -0.108*** | -0.099*** |
| (0.028) | (0.030) | (0.028) | (0.021) |
|  | -0.106*** | -0.117*** | -0.118*** | -0.098*** |
| (0.037) | (0.041) | (0.038) | (0.027) |
|  | -0.217*** | -0.231*** | -0.231*** | -0.149*** |
| (0.037) | (0.040) | (0.033) | (0.030) |
| Economic controls | N | Y | Y | Y |
| Meteorology controls | N | N | Y | N |
| Environmental pollution controls | N | N | N | Y |
| Year FE | Y | Y | Y | Y |
| Province FE | Y | Y | Y | Y |
| Within R² | 0.129 | 0.162 | 0.173 | 0.316 |
| Observation | 360 | 360 | 360 | 360 |

*Notes:* Standard errors in parentheses are clustered at province level, * *p* < 0.10, ** *p* < 0.05, *** *p* < 0.01.

1. **Robustness Test Related to Omitted Variables**

**2.1. Sample Selection Bias**

To optimize the temporal relevance of the study sample and address potential bias arising from the phased implementation timeline of the Artificial Intelligence Innovation Development Pilot Zone program, we narrow the focus to a shorter time window. The program was initially launched in early 2019 in Beijing and Shanghai, which prompted us to revise the sample period to span from 2018 to 2022. The regression results reported in Table A6 show that the coefficient on the variable *Treat* remains significantly negative, further confirming that the findings are consistent with the original baseline results.

Table A.6. *Narrowing time intervals (2018–2022)*

|  | *DV：PM2.5 (Log)* | | | |
| --- | --- | --- | --- | --- |
|  | (1) | (2) | (3) | (4) |
| Treat | -0.047*** | -0.044** | -0.039** | -0.042** |
| (0.016) | (0.018) | (0.018) | (0.016) |
| Economic controls | N | Y | Y | Y |
| Meteorology controls | N | N | Y | N |
| Environmental pollution controls | N | N | N | Y |
| Year FE | Y | Y | Y | Y |
| Province FE | Y | Y | Y | Y |
| Within R² | 0.072 | 0.104 | 0.203 | 0.256 |
| Observation | 150 | 150 | 150 | 150 |

*Notes:* Standard errors in parentheses are clustered at province level, * *p* < 0.10, ** *p* < 0.05, *** *p* < 0.01.

An important potential concern is whether our results are driven by a small number of outlier provinces. To address this issue, we present the estimation results using several different subsamples in Table A7. In columns (1) and (2), we exclude municipalities directly under the central government, as their political and administrative status differs from that of typical cities. This distinction may lead to fundamental differences in how these regions respond to vertical reforms in environmental governance compared to other cities. In columns (3) and (4), we further exclude autonomous regions, which often possess unique political and administrative characteristics in China, including variations in economic management, social welfare, and environmental protection policies. These differences could lead to distinct attitudes toward environmental governance in these regions compared to other cities. After these robustness checks, we retain only provincial-level samples, which represent the most common administrative model in China. After conducting these checks, we find that all coefficients remain significantly negative, further corroborating that the results are consistent with the initial baseline findings.

Table A.7. *Subsamples*

|  | *DV：PM2.5 (Log)* | | | |
| --- | --- | --- | --- | --- |
|  | Exclude municipal samples | | Provincial samples | |
|  | (1) | (2) | (3) | (4) |
| Treat | -0.068** | -0.078*** | -0.052* | -0.054** |
| (0.026) | (0.018) | (0.027) | (0.021) |
| Economic controls | N | Y | N | Y |
| Meteorology controls | N | Y | N | Y |
| Environmental pollution controls | N | Y | N | Y |
| Year FE | Y | Y | Y | Y |
| Province FE | Y | Y | Y | Y |
| Within R² | 0.057 | 0.248 | 0.040 | 0.275 |
| Observation | 312 | 312 | 276 | 276 |

*Notes:* Standard errors in parentheses are clustered at province level, * *p* < 0.10, ** *p* < 0.05, *** *p* < 0.01.

**2.2.** **Addressing the Interference of Concurrent Policies**

To isolate the impact of the Artificial Intelligence Innovation Development Pilot Zone from other concurrent environmental interventions, this study adjusts for overlapping regulatory measures during the same period. Specifically, we account for key environmental directives, such as the Central Ecological and Environmental Protection Supervision (CEPS) system, using the first instance of the Central Environmental Inspection Team entering each province as the policy window. The regression results presented in Table A.8 demonstrate that, even after controlling for the effects of these additional policies, the empirical findings of this study remain robust.

Table A.8. *Eliminate interference from CEPS*

|  | *DV：PM2.5 (Log)* | | | |
| --- | --- | --- | --- | --- |
|  | (1) | (2) | (3) | (4) |
| Treat | -0.087*** | -0.094*** | -0.093*** | -0.078*** |
| (0.025) | (0.027) | (0.024) | (0.016) |
| CEPS | -0.026 | -0.025 | -0.019 | -0.020 |
| (0.018) | (0.019) | (0.018) | (0.016) |
| Economic controls | N | Y | Y | Y |
| Meteorology controls | N | N | Y | N |
| Environmental pollution controls | N | N | N | Y |
| Year FE | Y | Y | Y | Y |
| Province FE | Y | Y | Y | Y |
| Within R² | 0.105 | 0.134 | 0.144 | 0.305 |
| Observation | 360 | 360 | 360 | 360 |

*Notes:* Standard errors in parentheses are clustered at province level, * *p* < 0.10, ** *p* < 0.05, *** *p* < 0.01.

1. **Robustness Test Related to Measurement Error**

**3.1. Alternative Dependent Variables**

It is undeniable that the dependent variable may be subject to measurement errors. To test the robustness of the results, we first substitute the original measure of *PM2.5* with global surface *PM2.5* concentration data (µg/m³) from Washington University in St. Louis[[1]](#footnote-1), with a resolution of 0.01° × 0.01°. This dataset has been widely used in air composition detection (Franz et al., 2017; Heyes & Zhu, 2019; Levelt et al., 2006) and air quality studies (Kim et al., 2020; Kumar et al., 2020; Zhang et al., 2018)[[2]](#footnote-2). We crop the original global raster data to focus specifically on the Chinese territory. The regression results for this alternative measure are reported in columns (1) and (2) of Table A9.

Second, we use *PM2.5* data from the National Air Quality Real-time Publishing Platform of the China National Environmental Monitoring Centre[[3]](#footnote-3), calculating the annual provincial-level *PM2.5* averages. These values are then used to replace the original *PM2.5* data in the baseline regression. The regression results for this alternative measure are shown in columns (3) and (4) of Table A9.

Finally, recognizing that *PM2.5* alone may provide a narrow view of air pollution, we substitute the dependent variable with the Air Quality Index (AQI). The AQI is an air quality evaluation indicator based on China's newly released "Environmental Air Quality Standards" (GB3095-2012), which encompasses six pollutants: SO₂, NO₂, PM10, PM2.5, O₃, and CO. A higher AQI value indicates a higher level of air pollution. Currently, the AQI serves as a key indicator for air pollution management and smog mitigation (Chen et al., 2018; Jiang et al., 2023; Zhang & Mu, 2018). We calculate the annual AQI values for each province by averaging the AQI values across cities within each province. The regression results for this alternative measure are reported in columns (5) and (6) of Table A9.

The regression results indicate that, regardless of the alternative measure used, the coefficients remain significantly negative, suggesting that the choice of dependent variable has minimal impact on the results.

Table A.9. *Alternative Dependent variable*

|  | *DV：UM PM2.5 (Log)* | | *DV：AQI PM2.5 (Log)* | | *DV：AQI* | |
| --- | --- | --- | --- | --- | --- | --- |
|  | (1) | (2) | (3) | (4) | (5) | (6) |
| DID | -0.109*** | -0.087*** | -0.114*** | -0.115*** | -0.085*** | -0.093*** |
| (0.025) | (0.021) | (0.036) | (0.033) | (0.028) | (0.025) |
| Economic controls | N | Y | N | Y | N | Y |
| Meteorology controls | N | Y | N | Y | N | Y |
| Environmental pollution controls | N | Y | N | Y | N | Y |
| Year FE | Y | Y | Y | Y | Y | Y |
| Province FE | Y | Y | Y | Y | Y | Y |
| Within R² | 0.106 | 0.319 | 0.031 | 0.077 | 0.027 | 0.056 |
| Observation | 360 | 360 | 300 | 300 | 300 | 300 |

*Notes:* Standard errors in parentheses are clustered at province level, * *p* < 0.10, ** *p* < 0.05, *** *p* < 0.01.

**3.2.** **Alternative Measures of Policy Pilot Year**

In the baseline regression, we classify AI Innovation Development Pilot Zones approved after September as being in the following year. To test the robustness of our results, we adjust this measure of the pilot zone establishment year. Under the revised measure, any pilot zone established within the calendar year (from January to December) is considered as occurring in that year. This adjustment aims to further assess the robustness of the findings and ensure that the classification of pilot zone establishment dates does not significantly influence the empirical results. The regression results reported in Table A10 indicate that, even with the revised measure of the reform year, the coefficient on Treat remains significantly negative, thereby confirming the robustness of the empirical results.

Table A.10. *Alternative Measurement of Reform Year*

|  | *DV：PM2.5 (Log)* | | | |
| --- | --- | --- | --- | --- |
|  | (1) | (2) | (3) | (4) |
| Treat | -0.077*** | -0.085*** | -0.084*** | -0.069*** |
| (0.025) | (0.027) | (0.024) | (0.016) |
| Economic controls | N | Y | Y | Y |
| Meteorology controls | N | N | Y | N |
| Environmental pollution controls | N | N | N | Y |
| Year FE | Y | Y | Y | Y |
| Province FE | Y | Y | Y | Y |
| Within R² | 0.085 | 0.116 | 0.129 | 0.291 |
| Observation | 360 | 360 | 360 | 360 |

*Notes:* Standard errors in parentheses are clustered at province level, * *p* < 0.10, ** *p* < 0.05, *** *p* < 0.01.

Reference for Appendix

Chen, S. Y., Guo, C. S., & Huang, X. F. (2018). Air Pollution, Student Health, and School Absences: Evidence from China. *Journal of Environmental Economics and Management*, *92*, 465-497.

Franz, H. B., McAdam, A. C., Ming, D. W., Freissinet, C., Mahaffy, P. R., Eldridge, D. L., Fischer, W. W., Grotzinger, J. P., House, C. H., Hurowitz, J. A., McLennan, S. M., Schwenzer, S. P., Vaniman, D. T., Archer, P. D., Atreya, S. K., Conrad, P. G., Dottin, J. W., Eigenbrode, J. L., Farley, K. A., . . . Sutter, B. (2017). Large sulfur isotope fractionations in Martian sediments at Gale crater. *Nature Geoscience*, *10*(9), 658-662

Heyes, A., & Zhu, M. Y. (2019). Air pollution as a cause of sleeplessness: Social media evidence from a panel of Chinese cities. *Journal of Environmental Economics and Management*, *98*, Article 102247.

Horbach, J., Rammer, C., & Rennings, K. (2012). Determinants of eco-innovations by type of environmental impact—The role of regulatory push/pull, technology push and market pull. *Ecological Economics*, *78*, 112-122.

Jiang, Z. X., Gao, Y. C., Cao, H. X., Diao, W. X., Yao, X., Yuan, C. C., Fan, Y. Y., & Chen, Y. (2023). Characteristics of ambient air quality and its air quality index (AQI) model in Shanghai, China. *Science of the Total Environment*, *896*, Article 165284.

Kim, J., Jeong, U., Ahn, M. H., Kim, J. H., Park, R. J., Lee, H., Song, C. H., Choi, Y. S., Lee, K. H., Yoo, J. M., Jeong, M. J., Park, S. K., Lee, K. M., Song, C. K., Kim, S. W., Kim, Y. J., Kim, S. W., Kim, M., Go, S., . . . Choi, Y. (2020). New Era of Air Quality Monitoring from Space: Geostationary Environment Monitoring Spectrometer (GEMS). *Bulletin of the American Meteorological Society*, *101*(1), E1-E22.

Kumar, P., Hama, S., Omidvarborna, H., Sharma, A., Sahani, J., Abhijith, K. V., Debele, S. E., Zavala-Reyes, J. C., Barwise, Y., & Tiwari, A. (2020). Temporary reduction in fine particulate matter due to 'anthropogenic emissions switch-off' during COVID-19 lockdown in Indian cities.

Levelt, P. F., Van den Oord, G. H. J., Dobber, M. R., Mälkki, A., Visser, H., de Vries, J., Stammes, P., Lundell, J. O. V., & Saari, H. (2006). The Ozone Monitoring Instrument. *Ieee Transactions on Geoscience and Remote Sensing*, *44*(5), 1093-1101.

Zhang, J. J., & Mu, Q. (2018). Air pollution and defensive expenditures: Evidence from particulate-filtering facemasks. *Journal of Environmental Economics and Management*, *92*, 517-536.

Zhang, X., Chen, X., & Zhang, X. B. (2018). The impact of exposure to air pollution on cognitive performance. *Proceedings of the National Academy of Sciences of the United States of America*, *115*(37), 9193-9197.

1. The global surface PM2.5 data from Washington University in St. Louis: https://sites.wustl.edu/acag/datasets/surface-pm2-5/ [↑](#footnote-ref-1)
2. The Atmospheric Chemistry and Analysis Group at Washington University in St. Louis estimates annual ground-level fine particulate matter (PM2.5) by combining aerosol optical depth (AOD) retrievals from NASA's MODIS, MISR, and SeaWIFS instruments with the GEOS-Chem chemical transport model. The resulting global surface observations are then calibrated using geographically weighted regression (GWR) to obtain the final data. [↑](#footnote-ref-2)
3. China Air Quality Online Monitoring and Analysis Platform: http://www.aqistudy.cn/historydata [↑](#footnote-ref-3)
